# 1 **Defining Strawberry Uniformity using 3D Imaging** 2 **and Genetic Mapping**

3  
4  
5  
6  
7  
8  
9  
10  
11  
12  
13  
14  
15  
16  
17  
18  
19  
20  
21  
22  
23  
24  
25  
26  
27  
28  
29  
30  
31  
32  
33  
34  
35  
36  
37

Bo Li<sup>1,2#\*</sup>, Helen M. Cockerton<sup>1\*</sup>, Abigail W. Johnson<sup>1</sup>, Amanda Karlström<sup>1</sup>, Eleftheria Stavridou<sup>1</sup>, Greg Deakin<sup>1</sup>, Richard J. Harrison<sup>1,3</sup>

<sup>1</sup>NIAB EMR, East Malling, Kent, ME19 6BJ, United Kingdom

<sup>2</sup>University of the West of England, Bristol, BS16 1QY, United Kingdom

<sup>3</sup>NIAB, Huntingdon Road, Cambridge, CB3 0LE, United Kingdom

Bo2.li@uwe.ac.uk

Helen.cockerton@emr.ac.uk

Abi.johnson@emr.ac.uk

Amanda.karlstrom@emr.ac.uk

Eleftheria.stavridou@emr.ac.uk

Greg.deakin@emr.ac.uk

Richard.harrison@niab.com

# Corresponding author: bo2.li@uwe.ac.uk. Tel: +44(0)1173281117

\* Authors contributed equally.

38

## 39 **Abstract**

40 Strawberry uniformity is a complex trait, influenced by multiple genetic and  
41 environmental components. To complicate matters further, the phenotypic assessment  
42 of strawberry uniformity is confounded by the difficulty of quantifying geometric  
43 parameters 'by eye' and variation between assessors. An in-depth genetic analysis of  
44 strawberry uniformity has not been undertaken to date, due to the lack of accurate and  
45 objective data. Nonetheless, uniformity remains one of the most important fruit quality  
46 selection criteria for the development of a new variety. In this study, a 3D-imaging  
47 approach was developed to characterise berry uniformity. We show that circularity of  
48 the maximum circumference had the closest predictive relationship with the manual  
49 uniformity score. Combining five or six automated metrics provided the best predictive  
50 model, indicating that human assessment of uniformity is highly complex. Furthermore,  
51 visual assessment of strawberry fruit quality in a multi-parental QTL mapping population  
52 has allowed the identification of genetic components controlling uniformity. A "regular  
53 shape" QTL was identified and found to be associated with three uniformity metrics. The  
54 QTL was present across a wide array of germplasm, indicating a strong candidate for  
55 marker-assisted breeding. A greater understanding of berry uniformity has been  
56 achieved through the study of the relative impact of automated metrics on human  
57 perceived uniformity. Furthermore, the comprehensive definition of strawberry uniformity  
58 using 3D imaging tools has allowed precision phenotyping, which has improved the  
59 accuracy of trait quantification. This tool has allowed us to illustrate the use of advanced  
60 image analysis towards the breeding of greater uniformity in strawberry.

61

62

## 63 **Key Words**

64 3D imaging, uniformity, achene, carpel-viability, breeding, fruit development

65

## 66 **Introduction**

67 Strawberries (*Fragaria x ananassa*) are not true fruits. The red fleshy pseudocarp of a  
68 strawberry is formed from a swollen flower base or receptacle. The true fruits are, in  
69 fact, the achenes which develop from a whorl of carpels and together form an  
70 aggregate-accessory fruit. The viability of both carpels and pollen play an important role  
71 in the resulting uniformity of berries <sup>1</sup>. Carpel position, density and viability dictate the  
72 shape, size and uniformity of a strawberry. Indeed, strawberry breeders have selected  
73 for high carpel densities in order to produce larger fruits <sup>1</sup>. Simple, classical studies

74 which remove all or part of the achenes from undeveloped pseudocarps has led to a  
75 cessation in the auxin “swelling signal” in the area beneath each achene and thus  
76 uneven fruit development<sup>2</sup>. In a similar fashion to achene removal, uneven pollination  
77 of the carpels, or absence of achene development, are the main causes of uneven  
78 pseudocarps<sup>3</sup>. Uneven successful pollination can be caused by damage to flowers  
79 through high temperature, frost or precipitation<sup>1</sup>. A late frost in spring could lead to  
80 carpel and other damage, resulting not only in malformation but also complete lack of  
81 strawberry development<sup>1</sup>. Strawberry flowers have a variable proportion of viable  
82 carpels and anthers between flower orders, both within a plant and also between  
83 different cultivars<sup>4,5</sup>. Indeed, primary fruit are more likely to be malformed due to the  
84 relatively lower quantities of viable anthers and pollen<sup>6,7</sup>.

85  
86 In spite of the environmental factors known to influence uniformity, literature has shown  
87 that strawberry uniformity still has a large genetic component and can be improved  
88 through breeding<sup>8,9</sup>. Indeed, where breeders have selected for increased uniformity  
89 within and among berries, improvements in uniformity were observed over time<sup>8</sup>.  
90 Cultivars have been shown to differ in their susceptibility to misshapen fruit, indicating a  
91 significant genetic component controlling uniformity<sup>1,8,10</sup>. For example, ‘Florida Elyana’  
92 is susceptible to rain damage, disrupting carpel development and thus misshapen fruit  
93 leading to lower market value<sup>9</sup>, similarly ‘Camerosa’ has been noted as a cultivar  
94 which is particularly susceptible to misshapen fruit with ~4% of yields lost as a result of  
95 misshapes<sup>10,11</sup>. By contrast, ‘Florida Radiance’ has high marketable yields and does  
96 not exhibit a high proportion of misshapen fruits<sup>9</sup>. Breeders can influence the proportion  
97 of uniform strawberries through selecting- be it directly or indirectly- for 1) even  
98 allocation of viable carpels across the receptacle within the flower 2) ready access to  
99 pollen within flowers and 3) high fertility of carpels ensuring even successful pollination.

100  
101 Strawberry is an important fruit crop with a global market revenue of 21,171 million  
102 USD in 2015<sup>12</sup>. Producing visually appealing strawberry fruit is one of the primary  
103 objectives in a strawberry breeding program<sup>13</sup>. Shape uniformity is an essential trait of  
104 strawberry fruits due to the direct association with product quality and value<sup>14</sup>.  
105 Increasing the uniformity of berries can increase the proportion of marketable fruit as  
106 berry irregularity is one of the primary imperfections leading to culling and reduced  
107 marketable yield<sup>8</sup>.

108  
109 As there is no well-defined strawberry phenotyping guidelines for fruit uniformity, the  
110 current system at NIAB EMR relies on visual assessments, which are subjective and  
111 laborious. Unlike morphological traits such as length, volume and colour, which can be  
112 accurately measured manually in a low-throughput manner, uniformity assessment is

113 extremely subjective. As there is no quantitative method of generating phenotypic data  
114 for uniformity, the genetic determinants of strawberry uniformity are still unknown.

115  
116 Computer vision has shown great potential to quantify external fruit quality and 2D  
117 imaging has been successfully implemented to measure the shape and size of fruits  
118 such as strawberries<sup>15</sup>, apples<sup>16</sup>, watermelon<sup>17</sup>, cherries<sup>18</sup> and mangos<sup>19</sup>. Basic  
119 shape traits such as length, width, aspect ratio and volume, and more sophisticated  
120 traits such as elliptic Fourier descriptors<sup>20</sup> have been quantified and used to describe  
121 variation in fruit quality. 3D imaging has been successfully used for phenotyping the  
122 crop canopy<sup>21,22</sup> and root architecture<sup>23,24</sup>, and a 3D strawberry phenotyping platform  
123 has been explored in our previous study<sup>25</sup>. With the 3D point cloud reconstructed based  
124 on the Structure from Motion (SfM) method<sup>26</sup>, basic size-related parameters have been  
125 measured in three dimensions allowing volume estimation with high accuracy<sup>27</sup>.  
126 Compared with shape and size evaluation, uniformity is a multi-dimensional trait,  
127 therefore it is not possible to quantify through 2D image analysis with a single viewing  
128 angle. The application of 3D image analysis for phenotyping the external qualities of  
129 fruit has not been sufficiently explored, and the basic, previously characterised, shape-  
130 and size-related parameters are not adequate for understanding uniformity.

131  
132 Here the application of a 3D phenotyping platform allows us to investigate the genetic  
133 basis of strawberry uniformity. The 3D image analysis software leverages the previously  
134 developed platform<sup>25</sup> in order to define eight new external variables and investigate  
135 their importance on manual uniformity assessment. This method was applied to a multi-  
136 parental strawberry mapping population in order to quantify the genetic components  
137 underpinning strawberry uniformity.

138

## 139 **Materials and methods**

### 140 **Plant material and experimental set-up**

141 A multi-parental strawberry population was generated through crossing 26 diverse  
142 cultivars and breeding lines to create a population of 416 genotypes made up of 26  
143 families each containing 16 individuals (Suppl. Figure 1). Progenitors were selected to  
144 represent diversity across multiple fruit quality traits. Twelve replicate runner plants  
145 were pinned down from each genotype into 9 cm square pots containing compost.  
146 Clonal plants were separated from parental plants and then placed in cold storage (-2  
147 °C) until the start of the experiment. Plants were potted into 2 L pots containing coir and  
148 fertigated at 1kg L<sup>-1</sup> (rate: 10 seconds every 45 min) using Vitex Vitafeed (N:P:K,  
149 176:36:255). Blocks were horizontal intersections across the polytunnels. Due to the  
150 large scale of the experiment, replicate blocks were set up at three week intervals. A  
151 Natupol Koppert bumble bee hive was added into each polytunnel to assist even

152 pollination. Strawberries were picked when ripe into egg boxes. Boxes were labeled  
153 with QR codes to assist tracking of genotypes. Strawberry uniformity was scored on a  
154 scale from 1 (irregular) to 9 (uniform) with extensive training provided for all assessors.  
155 Strawberry shape was allocated into 9 categories: globose, globose-conic, conic, long-  
156 conic, bi-conic, conic-wedge, wedge, square and miscellaneous. Manual uniformity  
157 scores were recorded in the field book app<sup>28</sup>, the QR scanning feature allowed quick  
158 access to the correct entry form.

159

### 160 **Genotyping and Linkage map**

161 DNA was extracted for each genotype from unopened leaflets using the Qiagen DNeasy  
162 plant mini extraction kit. Genotyping was conducted using the Axiom<sup>®</sup> IStraw35 384HT  
163 array<sup>29</sup> (i35k). Crosslink was used to generate linkage maps- a program developed  
164 specifically for polyploid plant species<sup>30</sup>. The map orders from 5 populations were  
165 combined to make the consensus map as detailed in the study of Harrison et al<sup>31</sup>.  
166 *Fragaria* × *ananassa* chromosome number is denoted by 1-7 and the sub-genome  
167 number is represented by A-D as specified in<sup>32</sup>.

168

### 169 **3D reconstruction**

170 The 3D imaging platform was a modified version of that developed by He et al.<sup>25</sup>.  
171 Strawberry fruit were placed in the middle of a turntable, on a dark blue holder made by  
172 polymeric foam (38 mm x 19 mm x 19 mm; height, length and width). Unlike the  
173 previous study, a webcam (Logitech C920, Newark, CA, USA) was fitted at a height of  
174 30 cm and horizontal distance of 25 cm away from the sample. QR codes on containers  
175 were scanned through the webcams allowing tracking of berries and automated labeling  
176 of image files. The imaging rig was placed inside a photography studio tent with  
177 constant LED illumination. The turntable rotated at a frequency of 50 seconds per full  
178 turn, and an image was captured every second. Six imaging platforms allowed  
179 concurrent imaging of replicate berries. The 3D reconstruction was implemented with  
180 Agisoft Photoscan (Agisoft, LLC, St. Petersburg, Russia), and in order to increase the  
181 accuracy and processing speed, all images were pre-processed by cropping to a  
182 smaller size (400 x 600 pixels). Background subtraction was achieved through arbitrary  
183 colour thresholding. The image processing software for webcam control and automated  
184 image pre-processing were written in C++ utilising the OpenCV Library<sup>25,33</sup>.

185

### 186 **Data processing pipeline of phenotypic traits extraction**

#### 187 ***Point cloud preprocessing***

188 In the preprocessing stage (Fig. 1), each point cloud model was converted from the  
189 colour space of RGB (Red, Green and Blue) to HSV (Hue, Saturation and Value).  
190 Arbitrary thresholding on the hue channel was used to remove the noise introduced in  
191 the reconstruction stage. The clean point cloud was translated to the origin of the 3D

192 coordinate system based on the distance between the moment of the point cloud and  
193 the origin. By calculating the eigenvector associated with the largest eigenvalue of the  
194 coordinates of points, a rotation matrix could be derived to represent the main  
195 orientation of the point cloud, which can be used to rotate the point cloud with the main  
196 orientation aligned with the z-axis. After rotation, the arbitrary threshold was applied  
197 again on the hue channel in order to segment the strawberry body and blue holder from  
198 the whole point cloud. The height of the holder was obtained by calculating the  
199 difference between the maximum and minimum values of the holder point cloud on the  
200 z-axis. As the original coordinate system generated by Structure from Motion (SfM)  
201 method has an arbitrary scale, each point cloud model needed to be standardised by  
202 the height of the holder, so that the sizes of all point clouds are comparable.

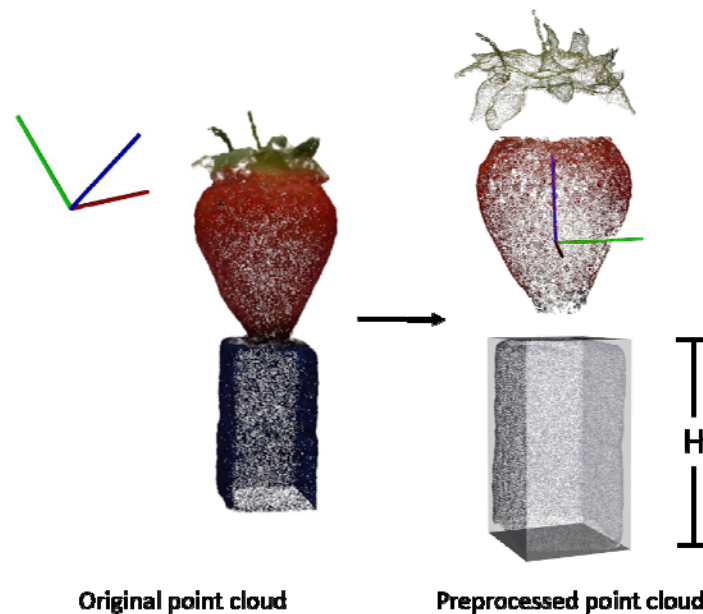

203  
204 **Figure 1.** Point cloud pre-processing for strawberry body extraction, translation to origin  
205 of xyz coordinate system and size standardisation.

### 206 ***Uniformity-related traits measurements***

208 Eight uniformity-related traits were calculated from the point cloud data of strawberry  
209 body after preprocessing. These are:

210

#### 211 **Coefficient of variation (CV) of side view areas (CV\_A) and the ratio between 212 maximum and minimum side view area (Max\_A/Min\_A)**

213 All side views should be identical in a perfectly uniform strawberry. In order to eliminate  
214 the heterogeneity introduced from the calyx and the holder, only the points within the  
215 middle 50% of the body height of each point cloud were retained for analysis (Fig. 2). In  
216 order to understand the heterogeneity of different side views of a point cloud, each point  
217 cloud was rotated along the z-axis by 3.6° for 99 rotations, and after each rotation, the

218 side view of the point cloud was projected onto the x-z plane in 2D (labelled in white). A  
219 convex hull was fitted to each projected image and the contour area was calculated. For  
220 area metrics, two traits were obtained; the CV of side view areas (CV\_A) and the ratio  
221 between the maximum and minimum area (Max\_A/Min\_A). An ideal uniform strawberry  
222 will have a value of zero for CV\_A and one for Max\_A/Min\_A.

223

### 224 CV of principal orientations (CV\_D)

225 The major eigenvector indicating the main orientation was calculated by principal  
226 component analysis (PCA) for all 100 side view projected images, and the  
227 heterogeneity of the orientations of the projected images was quantified by calculating  
228 the CV of angles of the main orientation. Like CV\_A, a perfectly uniform strawberry  
229 will have a value of zero for CV\_D.

230

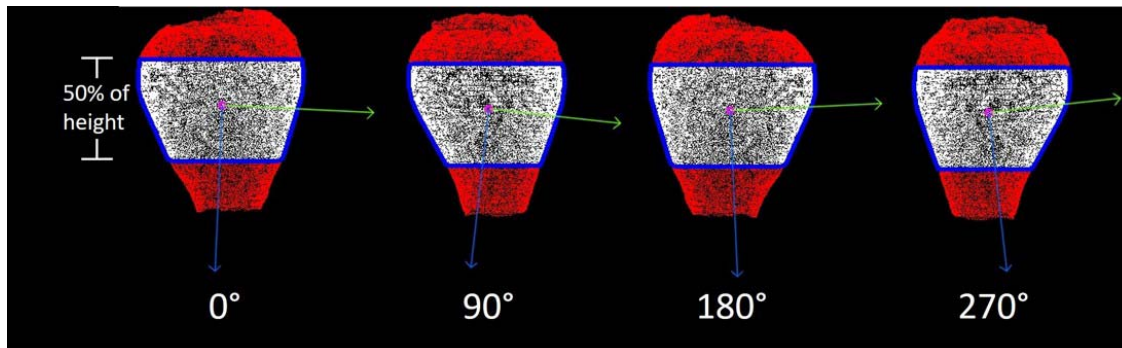

(a)

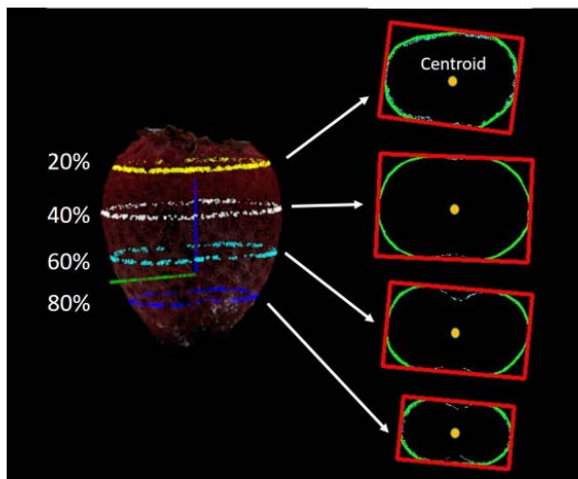

(b)

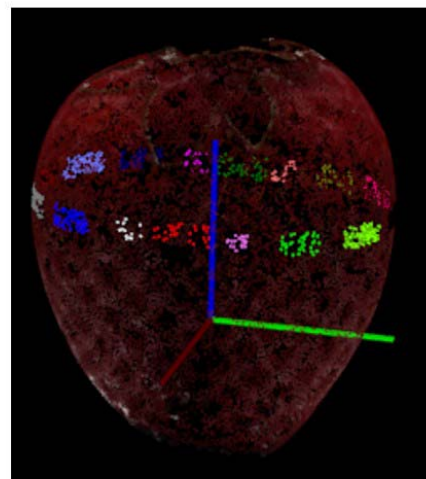

(c)

231

232 **Figure 2.** Side view of strawberry body for the CV measurement of the area and  
233 principal orientations. Convex hulls are outlined in blue, and blue and green arrows  
234 indicate the principal orientations (a). Extraction of example slice images horizontal to x-

235 y plane at the height of 20%, 40%, 60% and 80% of the total height. A minimum  
236 bounding box is fitted to each slice image (b). Sixteen patches of points labelled in  
237 different colours for curvature estimation (c).

238

### 239 **Aspect ratio of the minimum bounding box (L/W)**

240 A lateral slice image was obtained by identifying the intersection between the plane in  
241 parallel with the x-y plane and point cloud (Fig. 2b). Based on the values on the z-axis,  
242 100 evenly spaced slice images were obtained. The slice image with the largest contour  
243 was obtained by calculating the contour area of the convex hulls for all slice images.  
244 The main orientation of the contour was indicated by the major eigenvector of the PCA  
245 and the minimum bounding box was fitted to the slice images. The ratio between the  
246 length and width of the largest bounding box was derived and the ratio should be one  
247 for a perfectly uniform fruit.

248

### 249 **Circularity of the maximum circumference (CIR)**

250 Visually, the circularities of the contours in horizontal slice images are high if the  
251 strawberry is uniform. Circularity (CIR) was calculated as previously described<sup>34</sup>:

252

253

$$C = \frac{4\pi A}{p^2}$$

254 Where  $A$  and  $p$  are the area and perimeter of the convex hull respectively. For each  
255 point cloud, the circularity was calculated for the slice image with largest contour area.

256

### 257 **Straightness of centre axis (STR)**

258 The coordinates of the centroids for each horizontal slice image can be located by  
259 calculating the moment of the contour. The centroids can be connected as a straight  
260 line for a uniform strawberry. The centroids were calculated for all the slice images  
261 within the middle 80% of the body height, and the straightness of the central axis was  
262 characterised by:

263

264

$$STR = \frac{\sum_{i=1}^{N-1} d_i}{D}$$

265 Where  $N$  ( $N = 80$ ) is the number of slice images used for the analysis,  $d_i$  is the  
266 Euclidean distance between neighbouring slice images, and  $D$  is the Euclidean distance  
267 between the centroids of the top and bottom slice images.

268

### 269 **CV of curvature and the ratio between maximum and minimum curvatures** 270 **(Max\_C/Min\_C)**

271 The principal curvature can be calculated for each point in the point cloud, which  
272 describes how much the curve deviates from a straight line at this point. It can be  
273 imagined that the 3D curve can be sliced orthogonally around the direction of normal in



274 to 2D curve, and the maximum curvature  $k_1$  and minimum curvatures  $k_2$  are the two  
275 principal curvatures for the 3D curve<sup>35</sup>. The average curvature  $k$ , which is defined as  
276 the mean value of the magnitudes of principal curvatures in the two main directions was  
277 applied to quantify the curvature for a given point.

278  
279 As the curvature measurement is sensitive to noise, the point cloud surface of  
280 strawberry body was first smoothed by using Moving Least Squares (MLS) method<sup>36</sup>,  
281 which could reconstruct a smooth surface from the noisy point cloud. Sixteen patches of  
282 the points were selected evenly from the points forming the largest slice in parallel with  
283 x-y plane (Fig. 2c). For each patch, the first half largest curvatures were averaged and  
284 used to represent the curvature of the patch. With the curvatures of all 16 patches, the  
285 CV of curvature (CV\_C) and the ratio between maximum and minimum curvatures  
286 (Max\_C/Min\_C) were calculated.

287

288

## 289 **Statistical analysis**

### 290 **Ordinal regression**

291 Statistical analysis was performed using R (version 3.5.1) and the Genstat statistical  
292 package (Version 13.0, VSN International Ltd. England). Differences in uniformity traits  
293 within each shape groups were distinguished using ANOVA and Tukey post-hoc test.  
294 Pearson coefficients of correlation were calculated between all proposed uniformity-  
295 related traits. As the group labels are ordinal dependent variables, ordinal regression  
296 was used to evaluate the performances of all traits<sup>37</sup>. Model fit was ascertained by  
297 using selection criterion values based on the Akaike Information Criterion (AIC) and the  
298 Bayesian Information Criterion (BIC). In general, a better model fit generates lower  
299 values for both AIC and BIC<sup>38</sup>. In order to identify the optimal variable combination  
300 related to manual assessment, stepwise AIC and BIC methods were applied<sup>39</sup>. The  
301 most significant variable was identified by comparing the criterion values of all models.  
302 Other variables were added successively and retained if the model fit was improved.

303

### 304 **Genetic Analysis**

305 The best linear unbiased estimate (BLUE) was calculated for all genotypes in order to  
306 correct for the influence of assessor, data and block. Linear mixed-effects models were  
307 generated for each phenotypic trait with and without covariates. Grand scores for each  
308 genotype were calculated using mixed models to account for significant covariates.

309

### 310 **Composite interval mapping**

311 Multiparental QTL mapping was conducted in R using package “mppR”<sup>40</sup>. A  
312 permutation test determined the significance threshold<sup>41</sup>. A two-step QTL analysis was  
313 implemented: the selection of cofactors was achieved through Simple Interval Mapping

314 (SIM) proceeded by a multi-QTL model search using composite interval mapping (CIM)  
315 <sup>42,43</sup>. As a multi-parent population CIM works on parent relationships. Therefore the  
316 'CPEM0162' x 'Rumba' cross was removed as it is not directly related through the  
317 parental cultivar network. All other crosses were interrelated and formed a single  
318 network (Sup. Figure 1).

319

## 320 **Results**

### 321 **Characterisation of uniformity-related traits**

322 All the uniformity-related traits were calculated based on the point cloud, the mean  
323 values and the standard errors for each visual uniformity class are presented in Figure  
324 3. ANOVA results showed that significant differences were observed between uniformity  
325 classes for all traits ( $p < 0.001$ ). The Pearson's linear correlation coefficients were  
326 calculated between all traits, and strong correlations were found amongst  
327 Max\_A/Min\_A, L/W and CIR (Table 1).

328

329 Ordinal regression models were constructed for all variables and each variable  
330 independently. L/W was not significant due to the high correlation with other variables  
331 and CIR showed the best model fit with the lowest AIC and BIC values (Table 2). New  
332 variables were added sequentially to the model until no further improvement of the  
333 criterion value was observed. The AIC and BIC based stepwise selection methods  
334 showed inconsistent results (Table 3). The AIC based method showed the optimal  
335 criterion value with all variables except L/W and Max\_C/Min\_C, but BIC based method  
336 showed that STR could not improve the model fit.

337

### 338 **The influence of Shape on uniformity**

339 The shape of a strawberry influences the uniformity trait score. Bi-conic strawberries  
340 were seen to have high uniformity based on the area overlap measures (CV\_A &  
341 Max\_A/Min\_A), L/W and CIR scores indicating bi-conic strawberries have consistently  
342 circular horizontal transects at the mid point. Whereas for curvature uniformity  
343 measures (CV\_C & Max\_C/Min\_C) globose fruit are the most uniform and  
344 miscellaneous fruit the least (Data not shown). Both the manual uniformity score and  
345 CIR could discriminate miscellaneous shapes from the other shape categories (Figure  
346 4).

347

### 348 **QTL identification**

349 A total of 28 QTL were found to be associated with uniformity traits (Table 4). Of which  
350 25 were detected in more than one progenitor (Figure 5). Five focal SNP's, on  
351 chromosome 2B and 5D were found to represent more than one trait (Table 4, Figure  
352 6). The same focal SNP AX.166521303 was identified as important region in

353 Max\_A/Min\_A, CV\_A and CIR uniformity traits. Global adjusted  $R^2$  values for linear  
354 models were between 5.07 and 32.15 indicating the proportion of variation explained by  
355 identified QTLs (Table 5). All uniformity traits apart from CV\_A were significantly  
356 affected by date of picking. CV\_D had the largest broad sense heritability score of 38.4  
357 (Table 5).  
358

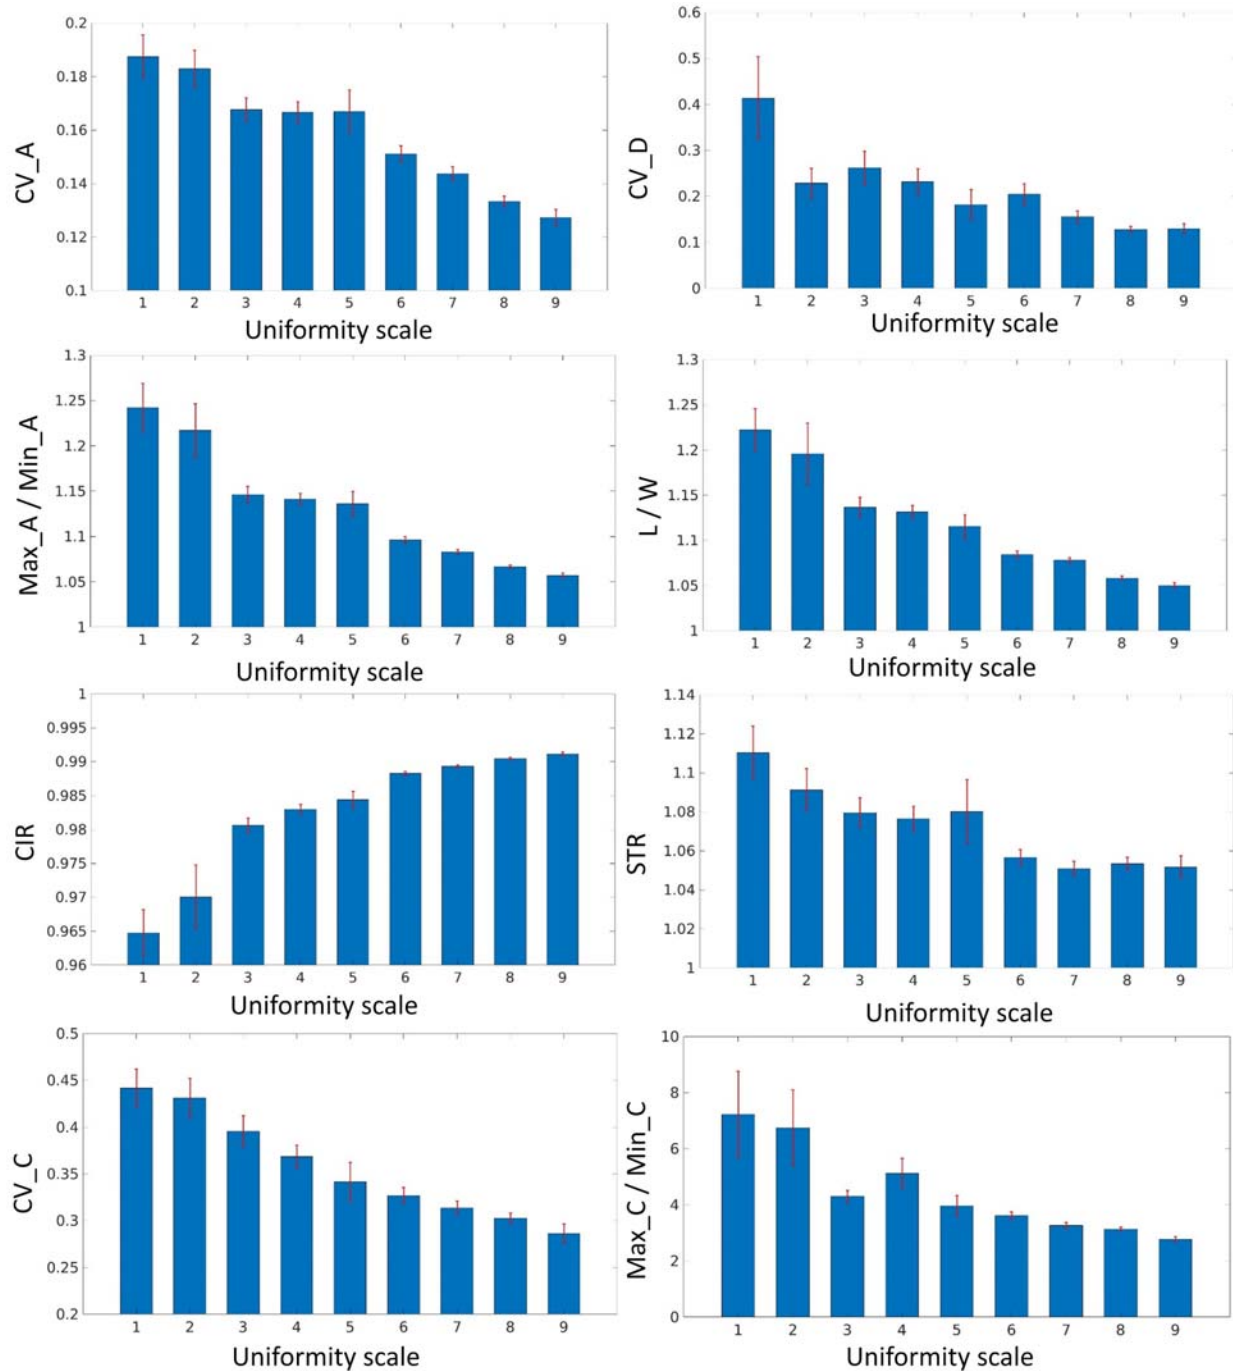

360 **Figure 3.** Mean value and standard error of calculated uniformity-related traits by the  
 361 newly developed 3D image analysis software against defined uniformity scale based on  
 362 manual assessment.

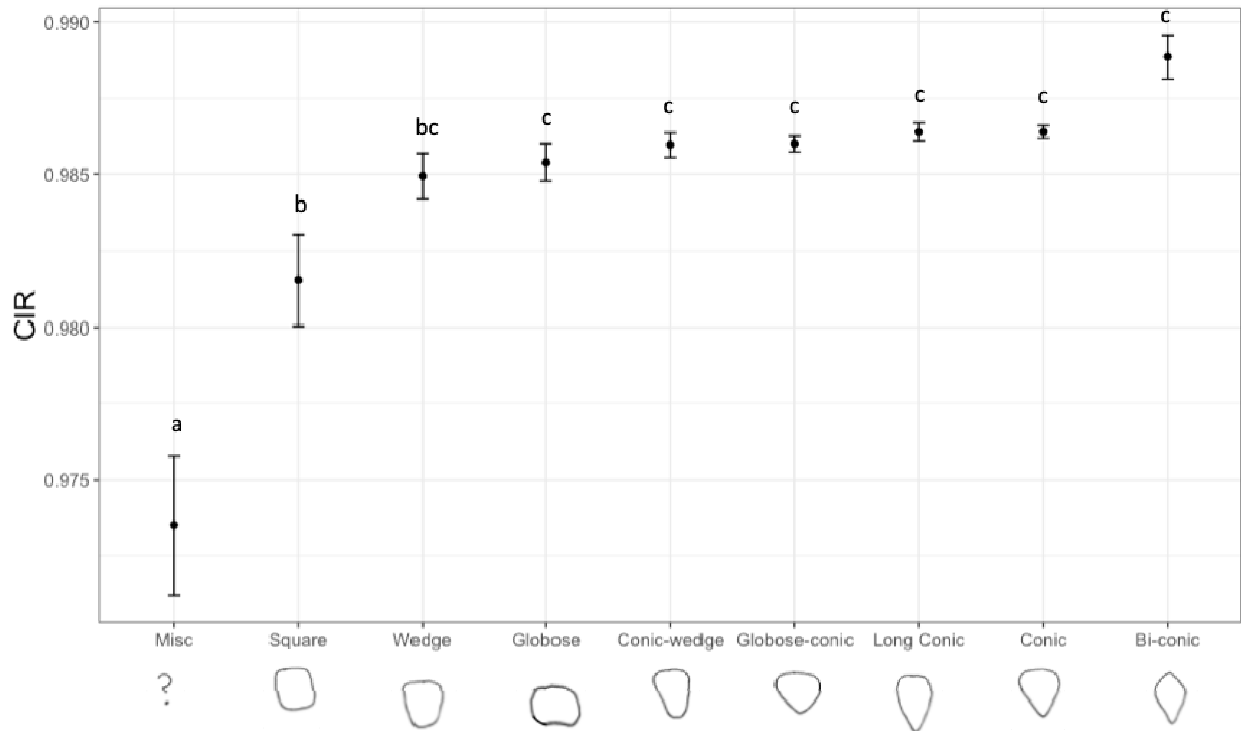

363 **Figure 4.** CIR scores for each manually classified strawberry shape category. Letters  
 364 denote significant differences between categories. Error bars are standard errors of the  
 365 mean.  
 366

367 **Table 1.** Pearson's linear correlation coefficients among all uniformity-related traits. All  
 368 values are significant at  $p < 0.05$  level.  
 369

|             | CV_A  | Max_A/Min_A | CV_D  | L/W   | CIR   | STR  | CV_C | Max_C/Min_C |
|-------------|-------|-------------|-------|-------|-------|------|------|-------------|
| CV_A        | 1.00  |             |       |       |       |      |      |             |
| Max_A/Min_A | 0.61  | 1.00        |       |       |       |      |      |             |
| CV_D        | 0.13  | 0.29        | 1.00  |       |       |      |      |             |
| L/W         | 0.54  | 0.90        | 0.27  | 1.00  |       |      |      |             |
| CIR         | -0.48 | -0.85       | -0.32 | -0.85 | 1.00  |      |      |             |
| STR         | 0.12  | 0.26        | 0.06  | 0.26  | -0.29 | 1.00 |      |             |
| CV_C        | 0.21  | 0.24        | 0.07  | 0.23  | -0.25 | 0.15 | 1.00 |             |



|            |         |         |         |         |         |         |         |         |
|------------|---------|---------|---------|---------|---------|---------|---------|---------|
| <b>AIC</b> | 3401.65 | 3374.40 | 3374.29 | 3362.57 | 3302.01 | 3299.53 | 3291.87 | 3288.40 |
| <b>BIC</b> | 3445.35 | 3422.95 | 3427.70 | 3415.97 | 3360.28 | 3362.65 | 3354.99 | 3356.38 |

381

382

383 **Supplementary Table 4.** Focal SNPs representing strawberry uniformity QTL. The  
 384 position of QTL is reported in Mb as scaled to the vesca version 4 genome  
 385

| Marker Names        | Chromosome | Pos Mb      | $\log^{10} p$<br>value | R <sup>2</sup> | Trait             |
|---------------------|------------|-------------|------------------------|----------------|-------------------|
| AX.89804099         | 3B         | 96.3        | 3.29                   | 6.9            | Visual Uniformity |
| AX.123357183        | 2D         | 63.1        | 4.07                   | 3.81           | Max_C/Min_C       |
| AX.166513757        | 4B         | 239.6       | 3.03                   | 5.05           | Max_C/Min_C       |
| AX.166523206        | 4D         | 272.0       | 3.89                   | 4.03           | Max_C/Min_C       |
| AX.166514922        | 5D         | 1.8         | 3.02                   | 9.9            | Max_C/Min_C       |
| AX.89886024         | 5D         | 36.8        | 3.32                   | 2.87           | Max_C/Min_C       |
| AX.166525020        | 6B         | 34.4        | 3.49                   | 7.59           | Max_C/Min_C       |
| AX.166526040        | 7B         | 47.5        | 3.07                   | 2.71           | Max_C/Min_C       |
| AX.166521293        | 2B         | 60.7        | 3.74                   | 6.41           | CV_C              |
| AX.166519032        | 2C         | 183.5       | 3.04                   | 5.07           | STR               |
| <b>AX.166521303</b> | <b>2B</b>  | <b>63.1</b> | <b>3.29</b>            | <b>9.41</b>    | <b>CIR</b>        |
| AX.89791395         | 4B         | 130.4       | 3.17                   | 2.71           | CIR               |
| AX.166509340        | 4C         | 241.7       | 3.00                   | 2.37           | CIR               |
| AX.89890707         | 5C         | 212.2       | 3.11                   | 1.86           | CIR               |
| AX.166526395        | 7C         | 228.6       | 3.81                   | 3.95           | CIR               |
| AX.89873861         | 1A         | 139.7       | 3.73                   | 5.27           | L/W               |
| AX.123357666        | 3B         | 303.6       | 3.35                   | 3.42           | L/W               |
| AX.89829301         | 4D         | 182.3       | 3.03                   | 2.06           | L/W               |

|                     |           |              |             |              |                    |
|---------------------|-----------|--------------|-------------|--------------|--------------------|
| AX.166524494        | 5B        | 103.6        | 3.25        | 3.83         | L/W                |
| <b>AX.89791880</b>  | <b>5D</b> | <b>123.7</b> | <b>3.52</b> | <b>1.46</b>  | <b>L/W</b>         |
| AX.89792701         | 5D        | 182.0        | 3.61        | 10.64        | L/W                |
| AX.166503621        | 2C        | 266.2        | 3.89        | 2.19         | CV_D               |
| AX.166504095        | 3A        | 149.5        | 4.10        | 2.8          | CV_D               |
| AX.166525754        | 6C        | 74.7         | 3.25        | 3.58         | CV_D               |
| <b>AX.166521303</b> | <b>2B</b> | <b>63.1</b>  | <b>4.55</b> | <b>15.08</b> | <b>Max_A/Min_A</b> |
| <b>AX.89791880</b>  | <b>5D</b> | <b>123.7</b> | <b>4.22</b> | <b>3.11</b>  | <b>Max_A/Min_A</b> |
| AX.166506309        | 5D        | 150.8        | 3.16        | 2.48         | Max_A/Min_A        |
| AX.166523943        | 5D        | 233.9        | 3.42        | 4.47         | Max_A/Min_A        |
| <b>AX.166521303</b> | <b>2B</b> | <b>63.1</b>  | <b>3.86</b> | <b>6.28</b>  | <b>CV_A</b>        |
| AX.89788547         | 5D        | 40.9         | 3.61        | 5.8          | CV_A               |

386  
387  
388  
389  
390

**Table 5.** Broad sense heritability scores for each automated uniformity trait, the influence of block and date of assessment on the trait measured. The number of QTL and the coefficient of determination associated with combined QTL.

| Trait       | Heritability | Significance of Block | Significance of Date | GxE | Number of QTL | R2    | R2 adj |
|-------------|--------------|-----------------------|----------------------|-----|---------------|-------|--------|
| STR         | 21.70        | ***                   | ***                  | *** | 1             | 5.07  | 4.63   |
| CIR         | 22.00        | ***                   | ***                  | *** | 5             | 21.2  | 19.3   |
| CV_D        | 38.40        | ***                   | ***                  | *** | 3             | 9.35  | 8.05   |
| CV_A        | 19.95        | NS                    | NS                   | *** | 2             | 12.13 | 11.29  |
| CV_C        | 24.63        | ***                   | ***                  | *** | 1             | 6.41  | 5.97   |
| L/W         | 19.20        | ***                   | **                   | *** | 6             | 24.77 | 22.59  |
| Max_C/Min_C | 16.70        | NS                    | *                    | NS  | 7             | 32.15 | 29.85  |

|             |       |    |     |     |   |      |       |
|-------------|-------|----|-----|-----|---|------|-------|
| Max_A/Min_A | 22.70 | ** | *** | *** | 4 | 23.1 | 21.62 |
| Uniformity  | 8.00  | NS | *** | *** | 1 | 6.9  | 6.46  |

391  
392  
393

|             | Man Uni     | CV_A         | Max_A/Min_A |              | CV_D         | LW          |              | CIR          |              |              | STR         | CV_C         | Max_C/Min_C |              |             |              |              |             |              |             |              |              |              |              |              |              |              |             |              |              |       |
|-------------|-------------|--------------|-------------|--------------|--------------|-------------|--------------|--------------|--------------|--------------|-------------|--------------|-------------|--------------|-------------|--------------|--------------|-------------|--------------|-------------|--------------|--------------|--------------|--------------|--------------|--------------|--------------|-------------|--------------|--------------|-------|
|             | AX.89800099 | AX.166521303 | AX.89798547 | AX.166521303 | AX.166506309 | AX.89798880 | AX.166529943 | AX.166508621 | AX.166504095 | AX.166525754 | AX.89872861 | AX.123317666 | AX.89822901 | AX.166524494 | AX.89798880 | AX.897982701 | AX.166521303 | AX.89798395 | AX.166509340 | AX.89890707 | AX.166526395 | AX.166519032 | AX.166521293 | AX.123317183 | AX.166513757 | AX.166523206 | AX.166514922 | AX.89886024 | AX.166524020 | AX.166526040 |       |
| FA2311      | 1.26        |              |             |              |              | -0.68       |              |              |              |              |             |              |             |              |             |              |              |             |              |             |              | 1.01         |              |              |              |              | NA           |             | 1.04         |              |       |
| FA2807      |             |              | -0.72       |              |              | -0.68       |              |              |              | -1.56        |             |              |             |              |             |              |              | -0.52       | -0.84        |             | -0.49        |              |              |              |              |              |              | -0.75       |              |              |       |
| FA0123      |             |              |             |              |              | -0.68       | NA           |              |              |              |             |              |             |              |             |              |              |             | -0.52        | -0.84       |              | -0.49        | -0.74        |              |              |              |              |             | 1.04         | -0.80        |       |
| FA0193      |             |              |             | 0.65         |              | -0.68       |              |              |              |              |             |              |             |              |             |              |              |             |              |             |              |              |              |              |              |              |              |             |              |              |       |
| FA0248      |             |              |             | 0.65         |              | -0.68       |              |              |              |              |             |              |             |              |             |              |              |             |              |             |              |              | 1.01         |              |              |              |              |             |              |              |       |
| FA0307      | 1.26        |              | -0.72       |              |              | -0.68       |              | 1.18         |              | 1.11         |             | -0.90        | 1.37        |              |             |              |              |             |              |             |              |              |              |              |              | 0.70         |              | -0.75       |              | -0.40        |       |
| FA0676      |             |              |             |              |              | -0.68       | 2.32         |              |              | 2.23         |             |              |             |              |             |              |              | -0.84       | -0.49        | -0.74       |              | 1.01         |              |              | 0.70         |              |              | 1.04        | -0.40        |              |       |
| FA0677      |             | NA           |             |              |              | -0.68       |              | NA           |              |              |             |              |             |              |             |              |              | -0.52       |              |             |              | 1.01         |              |              |              |              |              |             |              |              |       |
| FA0909      |             |              |             | 0.65         |              | -1.35       |              |              |              |              |             |              |             |              |             |              |              |             |              |             |              | 1.01         |              | -0.86        |              |              |              |             |              |              |       |
| FA1111      |             |              |             |              |              |             |              |              |              |              |             |              |             |              |             |              |              |             |              |             |              |              |              |              |              | 0.70         |              |             | 2.07         | -0.40        |       |
| FA1211      | 1.26        |              |             |              |              |             |              |              |              |              |             |              |             |              |             |              |              | -0.52       | -0.84        | -0.49       |              |              |              |              | 0.70         |              |              | 2.07        | -0.40        |              |       |
| FA1217      |             | -1.03        | -0.72       | -1.73        | 0.65         | -1.35       |              |              |              | 1.11         |             |              |             |              |             |              |              | -2.66       | 1.35         | -0.52       |              |              |              | -1.16        | -0.86        |              |              |             |              | -0.40        |       |
| FA2654      |             |              |             |              |              |             |              |              |              | 1.11         |             |              |             |              |             |              |              |             |              |             |              |              |              |              |              |              |              |             |              |              | -0.40 |
| FA6969      | 1.26        | -1.03        | -0.72       | -1.73        |              | -0.68       |              |              |              | 1.11         | 1.80        |              |             |              |             |              |              | -2.66       | 1.35         | -0.52       |              | -0.49        | -0.74        | 1.01         | -1.16        |              |              |             |              | -0.40        |       |
| FA0508      | 1.26        |              |             | -1.44        |              | -0.68       |              |              |              |              |             |              |             |              |             |              |              |             |              |             |              |              |              |              |              |              |              |             |              | -0.75        | -0.40 |
| FA9521      |             |              |             | -1.44        |              | -0.68       |              |              |              |              |             |              |             |              |             |              |              |             |              |             |              |              |              |              |              |              |              |             |              | -0.75        | -0.40 |
| FA2807      | -1.03       |              |             | -1.73        |              | -0.68       | NA           |              |              |              | 1.80        |              |             |              |             |              |              |             |              |             |              |              |              |              |              |              |              |             |              | -0.40        |       |
| FA2807      | -1.03       |              |             | -1.73        |              | -0.68       | NA           |              |              |              | 1.80        |              |             |              |             |              |              |             |              |             |              |              |              |              |              |              |              |             |              | -0.40        |       |
| FA2807      | 1.26        |              |             |              | 0.65         | -1.35       |              |              |              |              |             |              |             |              |             |              |              |             |              |             |              | 1.01         |              |              |              | 2.47         |              |             |              | -0.40        |       |
| FA2807      | -1.03       | -0.72        | -1.73       | 0.65         | -1.35        |             |              |              |              | -1.56        |             |              |             |              |             |              |              |             |              |             |              | 1.01         | -1.16        |              | 0.70         |              |              |             |              | -0.40        |       |
| FA1711      |             | -0.72        |             | 0.65         | 1.25         | -1.35       |              |              |              | -1.56        |             |              | NA          | 0.82         |             |              |              |             |              |             |              |              |              |              |              |              |              |             |              | 1.04         |       |
| FA2807      |             |              |             | 0.65         |              | -1.35       |              |              |              |              |             |              |             |              |             |              |              |             |              |             |              | 1.01         |              | -0.86        | 2.47         |              | 1.72         |             |              |              |       |
| FA2807      |             |              |             |              |              |             |              |              |              |              |             |              |             |              |             |              |              |             |              |             |              |              |              |              |              |              |              |             |              |              |       |
| FA2807      |             | -1.03        | -0.72       | -1.73        | NA           | NA          |              |              |              | -1.56        | NA          |              |             | NA           |             |              |              |             |              |             |              |              |              |              |              | 0.70         |              | NA          | 1.04         | NA           |       |
| M.Centenary |             | -1.03        | -0.72       | -1.73        | NA           | 1.25        | -0.68        |              |              | NA           |             |              |             | NA           | 0.82        | NA           | 1.35         | -0.52       | -0.84        | -0.99       | -0.74        | NA           | -1.16        |              | 0.70         |              | NA           | 1.04        | NA           | NA           |       |
| FA2807      |             | -0.72        |             | NA           | NA           |             |              | 2.32         |              |              | 1.80        |              |             |              | NA          |              |              |             |              |             |              |              |              |              |              |              |              |             |              |              | NA    |
| Vibrant     |             |              |             | NA           |              |             |              |              |              |              |             |              |             |              | NA          |              |              |             |              |             |              | NA           |              | -0.86        |              | NA           |              | NA          | NA           | NA           | NA    |

394  
395  
396  
397  
398  
399

**Figure 5.** Effect sizes associated with each QTL in each of the 26 progenitors; blue colour is associated with lower uniformity and red colour is associated with higher uniformity.



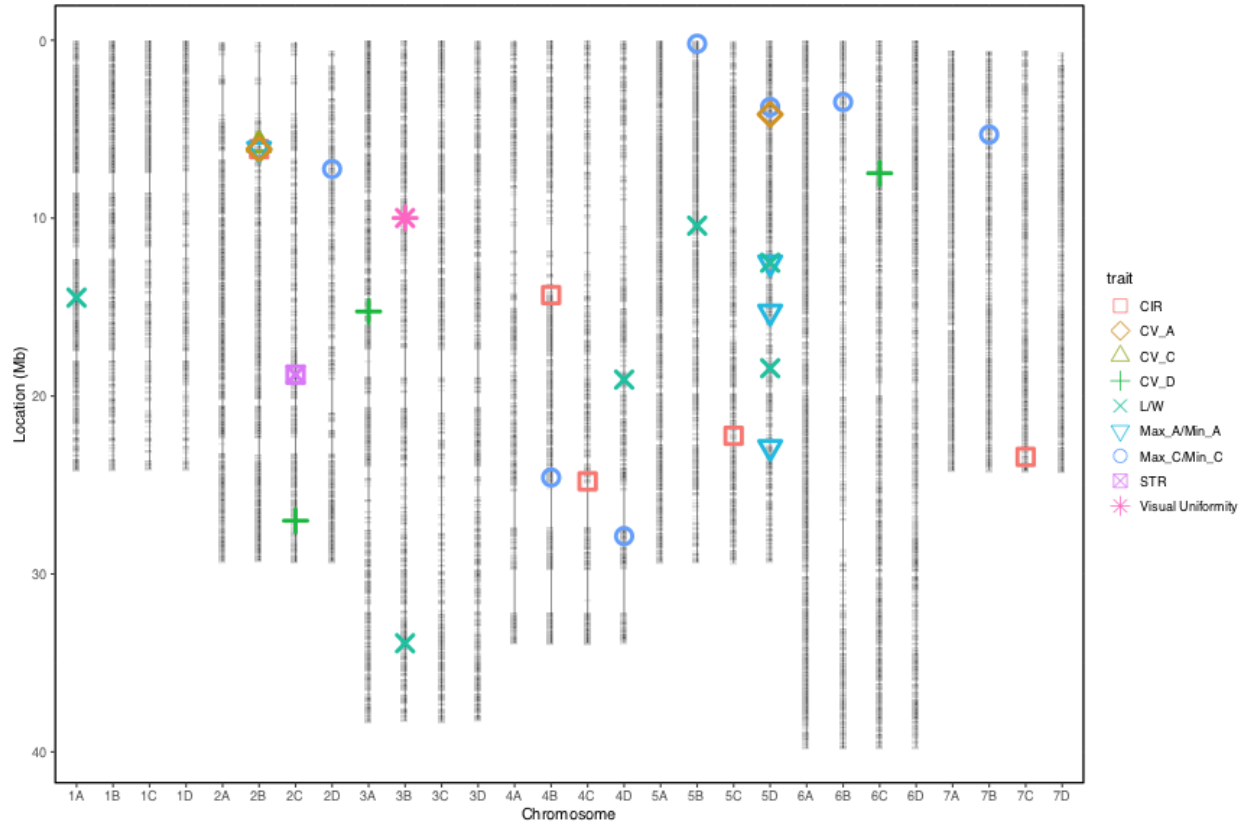

400  
401  
402  
403  
404  
405

**Figure 6.** Location of QTL on the octoploid consensus map scaled to the *Fragaria vesca* 'version four' genome. Horizontal grey lines represent istraw 35k axion array markers

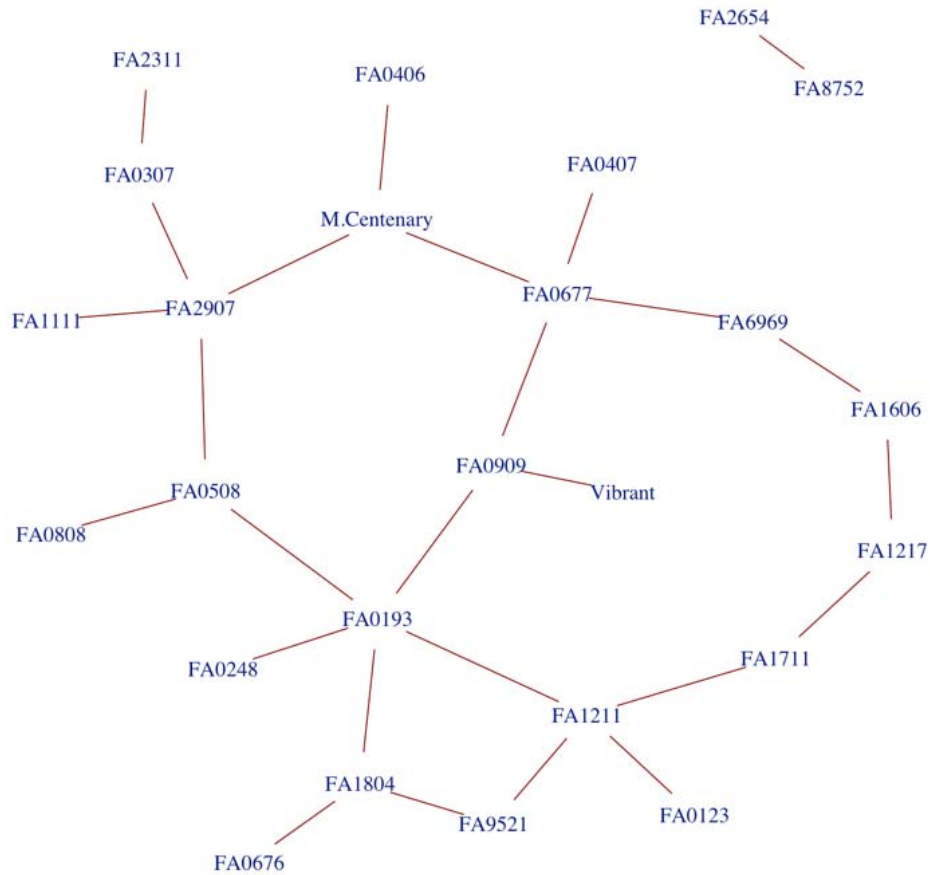

406  
407  
408  
409  
410

**Supplementary Figure 1.** A network of crosses conducted to generate the multiparental mapping population used in this study. Cultivars are represented by circles, families are represented by lines.

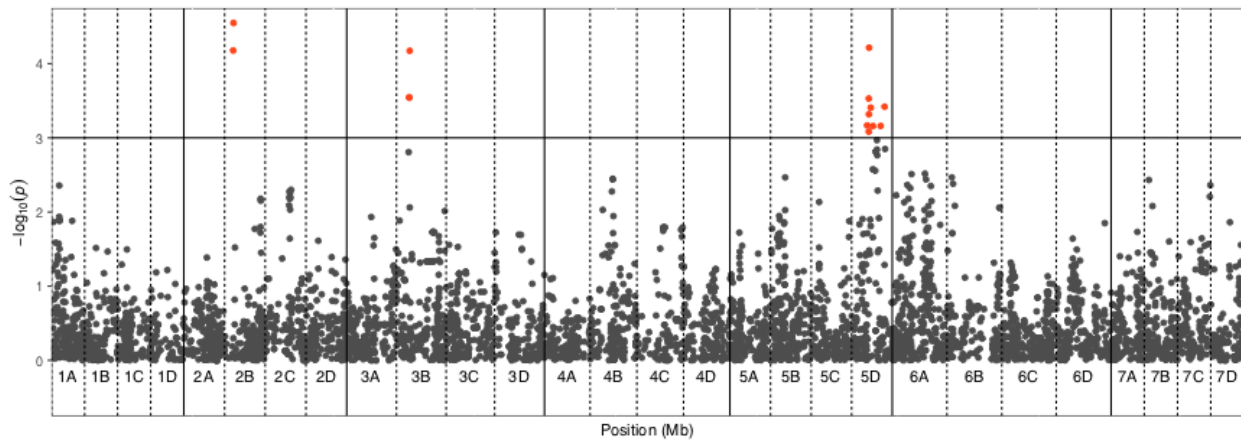

411  
412

(a)

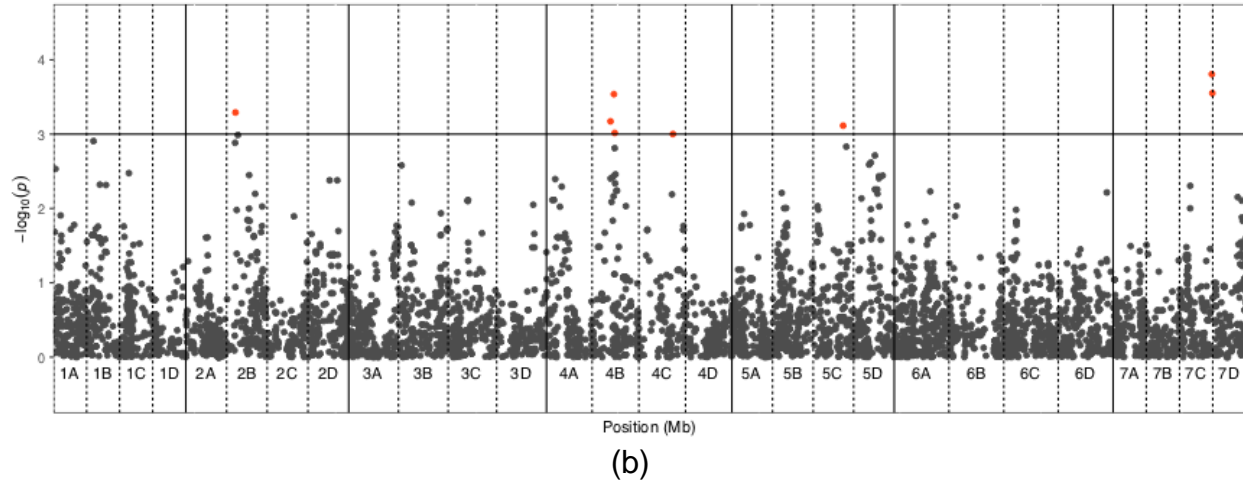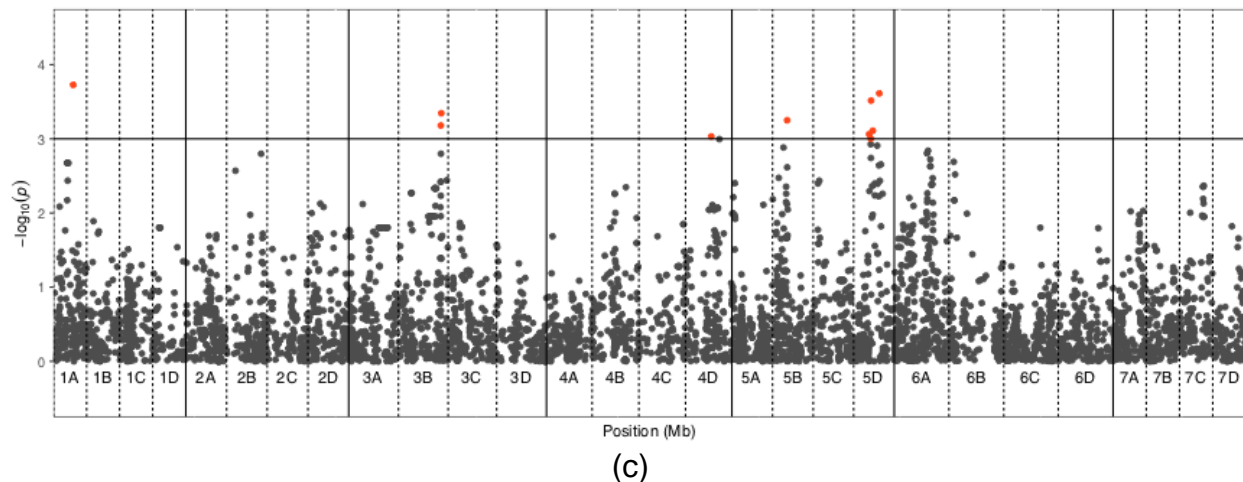

**Supplementary Figure 2.** Manhattan plots of (a) Max\_A/Min\_A, (b) LW and (c) CIR.

## Discussion

422 We report for the first time a robust method to measure strawberry uniformity and apply  
423 this technique to generate genetic markers for uniformity traits. Several studies have  
424 attempted to quantify strawberry fruit shape using 2D images with neural networks<sup>44</sup>,  
425 3D imaging<sup>45</sup> and by machine learning<sup>15</sup>. However, none of these studies investigated  
426 berry uniformity. Unlike the aforementioned studies, who measure a relatively small  
427 number of genotypes intensively, we have implemented a high throughput imaging  
428 platform across a large population to facilitate genetic analysis of the trait. Although  
429 strawberry shape has received greater attention in the literature, berry uniformity is a  
430 more important trait for a breeder to improve (Personal communication, Abigail  
431 Johnson).

432

433 In current strawberry breeding practice, there is no widely accepted criteria for  
434 quantifying uniformity due to the difficulty of defining a multidimensional trait. Here, the  
435 manual strawberry uniformity scale has been designed by NIAB EMR breeders. As  
436 such, the absence of a straightforward definition, has meant that it has not been  
437 possible to study the genetic components controlling strawberry uniformity in the past.  
438 To overcome this, we have used 3D image analysis to define the parameters underlying  
439 a breeder's perception of strawberry uniformity. The original 3D strawberry phenotyping  
440 system<sup>25</sup> could accurately measure basic size-related traits. In this study, the point  
441 cloud analysis software was further developed to quantify strawberry uniformity through  
442 eight proposed metrics. By comparing with the manual scale, the image processing  
443 pipeline has demonstrated an objective method of characterising strawberry uniformity  
444 components.

445

### 446 **Quantifying berry uniformity**

447 Circularity of the maximum circumference (CIR) of strawberries showed the best  
448 predictive ability for manual uniformity scores based on the ordinal regression model fit,  
449 when studying individual variables alone. A completely misshapen fruit with a severely  
450 undulating fruit surface will score a value of 1 for manual assessments, and these  
451 completely misshapen fruits were the easiest category to identify by eye, as they were  
452 clearly distinct from regular shapes. A low CIR value appears to represent the  
453 undulating misshapen and "miscellaneous" fruit (Figure 4 & 6). Miscellaneous berries  
454 are the most undesirable fruit shape category therefore it is highly beneficial to select  
455 against them. When multiple traits are combined to describe uniformity, the best fitting  
456 model required the combination of CIR, CV\_A and Max\_A/Min\_A, CV\_D and CV\_C.  
457 The five factors required for optimal model construction indicate that there are multiple  
458 uniformity components influencing the manual uniformity score.

459

### 460 **Misshapen fruit QTL**

461 One of the QTL represented by the focal marker AX.166521303 on chromosome 2B  
462 was found to be associated with CIR, this QTL was also associated with CV\_A and  
463 Max\_A/Min\_A, each of which were found in the best fitting model used to describe the  
464 manual uniformity score. The focal SNP AX.166521303 was found to be present and  
465 significant in six progenitors and had an effect size of 9.14% on CIR. Therefore, this  
466 marker is a good candidate for marker assisted breeding in selection against completely  
467 mis-shapen and irregular strawberries. Furthermore, this work has highlighted a region  
468 of interest for further study to pinpoint the causative allele associated with reduced  
469 uniformity. Dissecting the contribution of genetic and environmental components  
470 believed to underpin strawberry uniformity; susceptibility to heat stress, carpel and  
471 pollen viability, achene position, size and distribution<sup>1</sup> may help to further elucidate the  
472 mechanism of uniformity segregating in the multiparental population.

473

### 474 **Uniformity trait selection**

475 The trait L/W shows little improvement on the overall combined trait model fit due to the  
476 high correlation with other traits including Max\_A/Min\_A and CIR, but it was still a good  
477 predictor of uniformity based on the model fit when studying individual variables alone.  
478 AIC and BIC based stepwise feature selection showed disagreement on the selection of  
479 the STR parameter. The difference between calculating AIC and BIC is that AIC does  
480 not account for the sample size, so when sample number is large, BIC applies larger  
481 penalty for complex models and leads to a simpler model<sup>46</sup>. However, this study does  
482 not aim to identify the optimal feature combination to develop prediction model related  
483 to manual uniformity evaluation, but develop a new image based quantification to  
484 replace the manual scale, because the ground-truth data are subjective and as such  
485 any large bias can reduce the robustness of model development. Moreover, the manual  
486 scale cannot be considered a comprehensive assessment as the parameter STR  
487 cannot be visually evaluated by eye. However, it must be said that if a trait cannot be  
488 detected by the human eye, then it is not a valuable trait for a strawberry breeder to  
489 select upon.

490

### 491 **Limitations of the system**

492 The 3D point cloud analysis software is independent of the imaging acquisition system,  
493 and the uniformity-related traits can be extracted automatically in a high-throughput  
494 manner. However, the imaging collection throughput was 50 seconds per fruit and the  
495 3D reconstruction has to be performed separately, which limits use to pre breeding  
496 experiments as opposed to use as a breeders tool. Due to the occlusion from the  
497 viewing angles, the strawberry nose cannot be fully reconstructed especially for globose  
498 shaped fruit, which decreases the accuracy of STR measurements and also limits the  
499 study on automated shape classification. To increase the throughput and accuracy of  
500 3D phenotyping, it is necessary to further develop the hardware with multiple cameras  
501 to allow more viewing angles or a structured light based imaging system with a robotic  
502 arm, and also integrate the hardware driver with 3D reconstruction software. The  
503 current point cloud image analysis software was able to characterise many key external  
504 traits which are important for strawberry breeding, however, the measurement of other  
505 parameters such as achene density must be investigated through an improved  
506 phenotyping platform in future studies.

507

### 508 **Genetic Control of Fruit Quality**

509 Papers detailing strawberry fruit quality QTL report genetic alleles associated with  
510 multiple fruit quality traits including fresh weight, metabolites, external colour and  
511 firmness<sup>29,47,48</sup>, however, there are currently no papers which report QTL associated  
512 with strawberry uniformity. Here, we provide a phenotyping platform which has

513 facilitated the assessment of the genetic components underlying strawberry uniformity  
514 for the first time. The use of a multi-parental population has allowed the study of a  
515 diverse set of germplasm and has ensured that resulting QTL to have a greater  
516 relevance for breeders when compared to alleles identified in bi-parental studies.  
517 Overall, 25 of the QTL were found to have an effect on uniformity in more than one of  
518 the 26 progenitors indicating that there has been limited linkage decay between the  
519 causal allele and marker, and that the relationships have been maintained across  
520 generations. Furthermore, the QTL on chromosome 2B was observed three times  
521 across different uniformity traits, such traits are only partially correlated and thus  
522 describe discrete components, as such this allele can be seen to play a major role in  
523 uniformity.

524

### 525 **Genetic control of strawberry fruit shape**

526 Unlike uniformity the mechanism controlling fruit shape has been studied extensively in  
527 the wild strawberry; *Fragaria vesca* and may act as a surrogate model for the cultivated  
528 octoploid strawberry *Fragaria x ananassa*. In *F. vesca*, fruit shape is primarily controlled  
529 by phytohormones<sup>49,50</sup>. Auxin increases the width of fruit and by contrast gibberellic  
530 acid (GA) increases the length of a strawberry whereas Abscisic acid (ABA) down  
531 regulates both Auxin and GA and thus reduces fruit expansion<sup>49,50</sup>. GA deficient Vesca  
532 mutants were found to have a “short” or globose berry shape, which, through the  
533 application of GA to the berry, could be restored to result in a “long” or long conic fruit  
534 shape<sup>50</sup>.

535

536 It is clear that breeders wish to select for greater berry uniformity however the  
537 confounding relationship between shape and uniformity must also be considered. For  
538 example, square, wedge and wedge-conic strawberries may have high 2D symmetry  
539 but not 3D symmetry. UK breeders primarily aim to select for conic or long conic fruit  
540 whereas globose, square, wedge and miscellaneous berries are classified as  
541 undesirable and biconic, globose-conic and conic-wedge fruit are seen as acceptable  
542 shapes (Personal Communication, Abigail Johnson). Here we provide an objective  
543 measure (CIR) that can be used to discriminate the least desirable berries -  
544 miscellaneous or misshapen berries and select for regular fruit shapes.

545

### 546 **Heritability of Uniformity**

547 Broad-sense heritability scores were between 16.70 and 38.40 for automated uniformity  
548 metrics indicating a greater genetic component than that associated with manual  
549 uniformity (8.00). These values indicate the proportion of variation segregating in the  
550 study population, however improvement in the heritability may also be caused, in part,  
551 by more accurate phenotypic measurements. In particular, high heritability was  
552 observed for CV\_D which indicates the angle of a strawberry related to whorl of carpels

553 (Figure 4) is under strong genetic control. Date of picking was seen to have a significant  
554 impact on all uniformity metrics apart from CV\_D which had a large genetic component.  
555 The high significance of date indicates the developmental environmental conditions has  
556 a significant impact on strawberry uniformity. Extreme temperatures were observed  
557 during the experiment which may have caused the significance of date. All traits apart  
558 from CV\_C showed a significant genotype by environment interaction indicating that  
559 genotypes were responding differently to heat stress. Misshapen fruit have been found  
560 to have a greater proportion of small underdeveloped achenes following exposure  
561 extreme temperatures during embryo development<sup>51,52</sup>.

562  
563 Here we provide a comprehensive dissection of the traits underlying strawberry uniformity and  
564 show that the visual perception of a strawberry can be represented by 5 metrics. The generation  
565 of an objective measure of uniformity has allowed the assessments of genetic components in a  
566 multi-parental breeding population. We show uniformity has a strong genetic component that  
567 can be improved by breeding and identify genetic components controlling uniformity that are  
568 present across a wide array of germplasm.

569  
570

#### 571 **Availability of data, materials and methods**

572 The software developed and datasets generated and analysed during the current study  
573 are available from the corresponding author on reasonable request.

574

#### 575 **Acknowledgements**

576 The authors acknowledge project partners Soloberry, Sainsburys, Botanicoir and  
577 Agrovista for their involvement and support of the project. The authors acknowledge  
578 Robert Vickerstaff for generating the octoploid consensus map as part of other projects  
579 and Dr Beatrice Denoyes, INRA and Dr Amparo Monfort, CRAG for granting the use of  
580 their informative markers in the production of the strawberry consensus linkage map.  
581 This work was supported by grants from the Biotechnology and Biological Sciences  
582 Research Council (BBSRC) BB/M01200X/2, BB/P005039/1 and Innovate UK project  
583 101914.

584

585

#### 586 **Authors' contributions**

587 BL – Analysed imaging data

588 AJ, HMC, ES, BL, RJH - Conceived and designed experiments

589 HMC – Conducted quantitative genetics analysis

590 AJ, HMC, AK - Performed experiments

591 AK - Performed genotyping

592 GD - Ordinal regression analysis

593 BL, HMC & RJH wrote the manuscript with contributions from all authors.

594 BL and HMC equally contributed to the manuscript.

595

### 596 **Conflict of interests**

597

598 On behalf of all authors, the corresponding author states that there is no conflict of  
599 interests regarding the publication of this work.

600

601

### 602 **List of Abbreviations**

603 CIM- composite interval mapping

604 CIR - Circularity

605 CV\_A - Coefficient of Variation of side view areas

606 CV\_C - Coefficient of Variation of curvatures

607 CV\_D - Coefficient of Variation of principal orientations

608 i35k - Istraw35 Affymetrix chip

609 L/W - Aspect ratio of the minimum bounding box

610 Max\_A/Min\_A - ratio between maximum and minimum side view areas

611 Max\_C/Min\_C - ratio between maximum and minimum curvatures

612 MedR - Median number of roots

613 QTL- Quantitative Trait Loci

614 QR - Quick Response

615 RGB- Red Green Blue

616 SNP - Single Nucleotide Polymorphism

617 STR- Straightness of centre axis

618

### 619 **Reference**

620 1 Carew JG, Morretini M, Battey NH. Misshapen fruits in strawberry. *Small Fruits*  
621 *Review*. 2003; **2**: 37–50.

622 2 Nitsch JP. Growth and morphogenesis of the strawberry as related to Auxin.  
623 *American Journal of Botany*. 1950; **37**: 211.

624 3 Kronenberg HG, Braak JP, Zeilinga AE. Poor fruit setting in strawberries. II.  
625 *Euphytica*. 1959; **8**: 245–251.

626 4 Thompson PA. Environmental effects on pollination and receptacle development in  
627 the strawberry. *Journal of Horticultural Science*. 1971; **46**: 1–12.



- 628 5 Darrow GM. The importance of sex in the strawberry. *Journal of Heredity*. 1925; **16**:  
629 193–204.
- 630 6 Darrow GM. The strawberry. *The Strawberry* 1966.
- 631 7 Gilbert C, Breen PJ. Low pollen production as a cause of fruit malformation in  
632 strawberry. *J Am Soc Hortic Sci* 1987.
- 633 8 Whitaker VM, Hasing T, Chandler CK, Plotto A, Baldwin E. Historical trends in  
634 strawberry fruit quality revealed by a Trial of University of Florida Cultivars and  
635 Advanced Selections. *HortScience*. 2011; **46**: 553–557.
- 636 9 Chandler CK, Santos BM, Peres NA, Jouquand C, Plotto A. ‘Florida Elyana’  
637 strawberry. *HortScience*. 2009; **44**: 1775–1776.
- 638 10 Zanin DS, Fagherazzi AF, dos Santos AM, Martins R, Kretschmar AA, Rufato L.  
639 Agronomic performance of cultivars and advanced selections of strawberry in the  
640 South Plateau of Santa Catarina State. *Revista Ceres*. 2019; **66**: 159–167.
- 641 11 Ariza MT, Soria C, Medina-Minguez JJ, Martínez-Ferri E. Incidence of misshapen  
642 fruits in strawberry plants grown under tunnels is affected by cultivar, planting date,  
643 pollination, and low temperatures. *HortScience*. 2012; **47**: 1569–1573.
- 644 12 Xiong Y, From PJ, Isler V. Design and evaluation of a novel cable-driven gripper  
645 with perception capabilities for strawberry picking robots. *2018 IEEE International  
646 Conference on Robotics and Automation (ICRA)*. 2018.  
647 doi:10.1109/icra.2018.8460705.
- 648 13 Faedi W, Mourgues F, Rosati C. Strawberry breeding and varieties: situation and  
649 perspectives. *Acta Horticulturae*. 2002; 51–59.
- 650 14 Nielsen JA, Lovell PH. Value of morphological characters for cultivar identification  
651 in strawberry (*Fragaria xananassa*). *New Zealand Journal of Crop and Horticultural  
652 Science*. 2000; **28**: 89–96.
- 653 15 Ishikawa T, Hayashi A, Nagamatsu S *et al*. Classification of strawberry fruit shape  
654 by machine learning. *ISPRS - International Archives of the Photogrammetry,  
655 Remote Sensing and Spatial Information Sciences*. 2018; **XLII-2**: 463–470.
- 656 16 Mir JI, Ahmed N, Singh DB *et al*. Diversity evaluation of fruit quality of apple (*Malus  
657 x domestica* Borkh.) germplasm through cluster and principal component analysis.  
658 *Indian Journal of Plant Physiology*. 2017; **22**: 221–226.
- 659 17 Akodagali J, Balaji S. Computer Vision and Image Analysis based techniques for  
660 automatic characterization of fruits a review. *International Journal of Computer  
661 Applications*. 2012; **50**: 6–12.
- 662 18 Beyer M, Hahn R, Peschel S, Harz M, Knoche M. Analysing fruit shape in sweet

- 663 cherry (*Prunus avium* L.). *Scientia Horticulturae*. 2002; **96**: 139–150.
- 664 19 Naik S, Patel B, Pandey R. Shape, size and maturity features extraction with fuzzy  
665 classifier for non-destructive mango (*Mangifera Indica* L., cv. Kesar) grading. 2015  
666 *IEEE Technological Innovation in ICT for Agriculture and Rural Development*  
667 (*TIAR*). 2015. doi:10.1109/tiar.2015.7358522.
- 668 20 Hiraoka Y, Kuramoto N. Identification of *Rhus succedanea* L. cultivars using Elliptic  
669 Fourier Descriptors based on fruit shape. *Silvae Genetica*. 2004; **53**: 221–226.
- 670 21 Paproki A, Sirault X, Berry S, Furbank R, Fripp J. A novel mesh processing based  
671 technique for 3D plant analysis. *BMC Plant Biol* 2012; **12**: 63.
- 672 22 Coupel-Ledru A, Pallas B, Delalande M *et al.* Multi-scale high-throughput  
673 phenotyping of apple architectural and functional traits in orchard reveals genotypic  
674 variability under contrasted watering regimes. *Hortic Res* 2019; **6**: 52.
- 675 23 Topp CN, Iyer-Pascuzzi AS, Anderson JT *et al.* 3D phenotyping and quantitative  
676 trait locus mapping identify core regions of the rice genome controlling root  
677 architecture. *Proc Natl Acad Sci U S A* 2013; **110**: E1695–704.
- 678 24 Cockerton, H.M., Li, B., Stavridou, E., Johnson, A., Karlström, A., Armitage, A.D.,  
679 Martinez-Crucis, A., Arjona, L.G. and Harrison, R.J. Genetic and phenotypic  
680 associations between root architecture, arbuscular mycorrhizal fungi colonisation  
681 and low phosphate tolerance in strawberry (*Fragaria × ananassa*).  
682 doi:10.21203/rs.2.18300/v1.
- 683 25 He JQ, Harrison RJ, Li B. A novel 3D imaging system for strawberry phenotyping.  
684 *Plant Methods* 2017; **13**: 93.
- 685 26 Westoby MJ, Brasington J, Glasser NF, Hambrey MJ, Reynolds JM. ‘Structure-  
686 from-Motion’ photogrammetry: A low-cost, effective tool for geoscience  
687 applications. *Geomorphology*. 2012; **179**: 300–314.
- 688 27 Kovacs L, Eder M, Hollweck R *et al.* Comparison between breast volume  
689 measurement using 3D surface imaging and classical techniques. *Breast* 2007; **16**:  
690 137–145.
- 691 28 Rife TW, Poland JA. Field Book: An Open-Source Application for field data  
692 collection on Android. *Crop Science*. 2014; **54**: 1624.
- 693 29 Verma S, Zurn JD, Salinas N *et al.* Clarifying sub-genomic positions of QTLs for  
694 flowering habit and fruit quality in U.S. strawberry (*Fragaria x ananassa*) breeding  
695 populations using pedigree-based QTL analysis. *Horticulture Research*. 2017; **4**:  
696 doi:10.1038/hortres.2017.62.
- 697 30 Vickerstaff RJ, Harrison RJ. Crosslink: A fast, scriptable genetic mapper for  
698 outcrossing species. *BioRxiv*, doi:10.1101/135277.

- 699 31 Cockerton HM, Vickerstaff RJ, Karlström A *et al.* Identification of powdery mildew  
700 resistance QTL in strawberry (*Fragaria x ananassa*). *Theor Appl Genet* 2018; **131**:  
701 1995–2007.
- 702 32 van Dijk T, Pagliarani G, Pikunova A *et al.* Genomic rearrangements and  
703 signatures of breeding in the allo-octoploid strawberry as revealed through an allele  
704 dose based SSR linkage map. *BMC Plant Biol* 2014; **14**: 55.
- 705 33 Laganiere R. OpenCV 3 Computer Vision Application Programming Cookbook.  
706 Packt Publishing Ltd, 2017.
- 707 34 Podczeck F, Rahman SR, Newton JM. Evaluation of a standardised procedure to  
708 assess the shape of pellets using image analysis. *Int J Pharm* 1999; **192**: 123–138.
- 709 35 Taubin G. Estimating the tensor of curvature of a surface from a polyhedral  
710 approximation. *Proceedings of IEEE International Conference on Computer Vision*  
711 1995. doi:10.1109/iccv.1995.466840.
- 712 36 Lancaster P, Salkauskas K. Surfaces generated by moving least squares methods.  
713 *Mathematics of Computation*. 1981; **37**: 141–141.
- 714 37 Gutierrez PA, Perez-Ortiz M, Sanchez-Monedero J, Fernandez-Navarro F, Hervás-  
715 Martínez C. Ordinal Regression methods: survey and experimental study. *IEEE*  
716 *Transactions on Knowledge and Data Engineering*. 2016; **28**: 127–146.
- 717 38 Chakrabarti A, Ghosh JK. AIC, BIC and recent advances in model selection.  
718 *Philosophy of Statistics*. 2011; 583–605.
- 719 39 Yamashita T, Yamashita K, Kamimura R. A stepwise AIC method for variable  
720 selection in linear regression. *Communications in Statistics - Theory and Methods*.  
721 2007; **36**: 2395–2403.
- 722 40 Garin V, Wimmer V, Mezrouk S, Malosetti M, van Eeuwijk F. How do the type of  
723 QTL effect and the form of the residual term influence QTL detection in multi-parent  
724 populations? A case study in the maize EU-NAM population. *Theor Appl Genet*  
725 2017; **130**: 1753–1764.
- 726 41 Churchill GA, Doerge RW. Empirical threshold values for quantitative trait mapping.  
727 *Genetics* 1994; **138**: 963–971.
- 728 42 Zeng ZB. Theoretical basis for separation of multiple linked gene effects in mapping  
729 quantitative trait loci. *Proc Natl Acad Sci U S A* 1993; **90**: 10972–10976.
- 730 43 Zeng Z-B. Precision mapping of quantitative trait loci. *Genetics* 1994; **136**: 1457–  
731 1468.
- 732 44 Oo LM, Aung NZ. A simple and efficient method for automatic strawberry shape  
733 and size estimation and classification. *Biosystems Engineering*. 2018; **170**: 96–107.

- 734 45 Kochi N, Tanabata T, Hayashi A *et al.* A 3D shape-measuring system for assessing  
735 strawberry fruits. *International Journal of Automation Technology*. 2018; **12**: 395–  
736 404.
- 737 46 Aho K, Derryberry D, Peterson T. Model selection for ecologists: the worldviews of  
738 AIC and BIC. *Ecology*. 2014; **95**: 631–636.
- 739 47 Castro P, Lewers KS. Identification of quantitative trait loci (QTL) for fruit-quality  
740 traits and number of weeks of flowering in the cultivated strawberry. *Molecular*  
741 *Breeding*. 2016; **36**. doi:10.1007/s11032-016-0559-7.
- 742 48 Lerceteau-Köhler E, Moing A, Guérin G *et al.* Genetic dissection of fruit quality  
743 traits in the octoploid cultivated strawberry highlights the role of homoeo-QTL in  
744 their control. *Theor Appl Genet* 2012; **124**: 1059–1077.
- 745 49 Liao X, Li M, Liu B *et al.* Interlinked regulatory loops of ABA catabolism and  
746 biosynthesis coordinate fruit growth and ripening in woodland strawberry. *Proc Natl*  
747 *Acad Sci U S A* 2018; **115**: E11542–E11550.
- 748 50 Wang S-M, Wei-jia LI, Yue-xue LIU, He LI, Yue MA, Zhang Z-H. Comparative  
749 transcriptome analysis of shortened fruit mutant in woodland strawberry (*Fragaria*  
750 *vesca* ) using RNA-Seq. *Journal of Integrative Agriculture*. 2017; **16**: 828–844.
- 751 51 Ariza MT, Soria C, Medina JJ, Martínez-Ferri E. Fruit misshapen in strawberry  
752 cultivars (*Fragaria xananassa*) is related to achenes functionality. *Annals of Applied*  
753 *Biology*. 2011; **158**: 130–138.
- 754 52 Pipattanawong R, Yamane K, Fujishige N, Bang S-W, Yamaki Y. Effects of high  
755 temperature on pollen quality, ovule fertilization and development of embryo and  
756 achene in 'Tochiotome' strawberry. *Journal of the Japanese Society for*  
757 *Horticultural Science*. 2009; **78**: 300–306.
